# Supplementary material for: Construction of a photonic radiative cooling layer based on a 3D conductive network foam for efficient electromagnetic interference shielding and environmental thermal comfort
Source: Royal Society of Chemistry journal article supplement (doi:10.1039/d4ta06651k), 2024-10-29
Supplement: d4ta06651k1.pdf [file d4ta06651k1.pdf]

### **Supporting Materials**

#### **Construction of photonic radiative cooling layer based on 3D conductive network foam for efficient electromagnetic interference shielding and environmental thermal comfort**

Mingtai Liu, Hongjian Huang\*, Jie Mei, Siqu Yang\*, Hao Tu, Jian Wang\*

Key Laboratory of materials and surface technology (Ministry of Education), School of Materials Science and Engineering, Xihua University, Chengdu 610039, People's Republic of China

\*Corresponding author.

E-mail address: wangjianxhu@163.com (Jian Wang)

Postal address: No. 999 Jinzhou Road, Chengdu 610039, People's Republic of China

## **Materials**

MF was purchased from Shanghai Beiyou Construction Materials Co., Ltd., China. Aramid paper was acquired from DuPont, USA. Pyrrole ( $C_4H_5N$ ) was bought by Macklin Biochemica Technology Co., Ltd., Shanghai, China. Polydimethylsiloxane (PDMS) and the curing agent were procured by Dow Corning Corporation, USA. High purity  $Al_2O_3$  powder was purchased from Hebei Juli Metal Material Co., Ltd., China. Conductive silver paint was purchased from the Shenzhen Jingche Technology Enterprise Shop. Ammonia ( $NH_3 \cdot H_2O$ ), ferric chloride ( $FeCl_3 \cdot 6H_2O$ ), ferrous sulfate ( $FeSO_4 \cdot 7H_2O$ ), ethyl acetate ( $C_4H_8O_2$ ) was acquired uniformly from Chengdu Kelong Chemicals Co., Ltd., China. Deionized water for experiments was prepared by Q-20C purification system.

## **Characterization**

The micromorphology and elemental mapping of samples were investigated with field emission scanning electron microscope (FE-SEM, ZEISS Gemini 300, Germany) and energy dispersive spectrometer (EDS, Smarted X). An X-ray diffractometer (XRD, Rigaku SmartLab SE, Japan) was applied to characterize the crystal structure of samples. The electrical conductivity and magnetic properties of the samples were determined by the four-probe method (ST2643F and ST2258C) and vibrating sample magnetometer (VSM, Lake Shore 7404, USA). Optical reflectance (R) and transmittance (T) of the samples were measured in the range of 200-2500 nm using a UV-Visible Near Infrared Spectrophotometer (Japan-Shimadzu-UV-3600 plus). The infrared thermal emissivity was collected by a Fourier infrared spectrometer (Bruker inveno s) with a measurement range of 2.5-25  $\mu m$ . Full-spectrum metal halide lamp (UVB, Huizhou Jinke Lighting Technology Co.) was used to provide simulated sunlight. A solar power meter pyranometer (TES 132) was used to measure the light

intensity of the sunlight. A vector network analyzer (Agilent PNA-N5234A-USA) was used to acquire the S-parameters of the samples by the waveguide method. The total shielding effectiveness ( $SE_T$ ), reflection shielding effectiveness ( $SE_R$ ), absorption shielding effectiveness ( $SE_A$ ), multiple reflection shielding ( $SE_M$ ) and the power coefficient of absorption (A), reflection (R) and transmission (T) were calculated as follows:

$$R = |S_{11}|^2, T = |S_{21}|^2 \quad (1)$$

$$A = 1 - R - T \quad (2)$$

$$SE_A = -10 \lg \left( \frac{|S_{21}|^2}{(1 - |S_{11}|^2)} \right) = -10 \lg (T / (1 - R)) \quad (3)$$

$$SE_R = -10 \lg (1 - |S_{11}|^2) = -10 \lg (1 - R) \quad (4)$$

$$SE_T = SE_A + SE_R + SE_M \quad (5)$$

In general,  $SE_M$  is negligible when the  $SE_T > 15\text{dB}$ , and  $SE_T$  can be expressed as:

$$SE_T = SE_A + SE_R \quad (6)$$

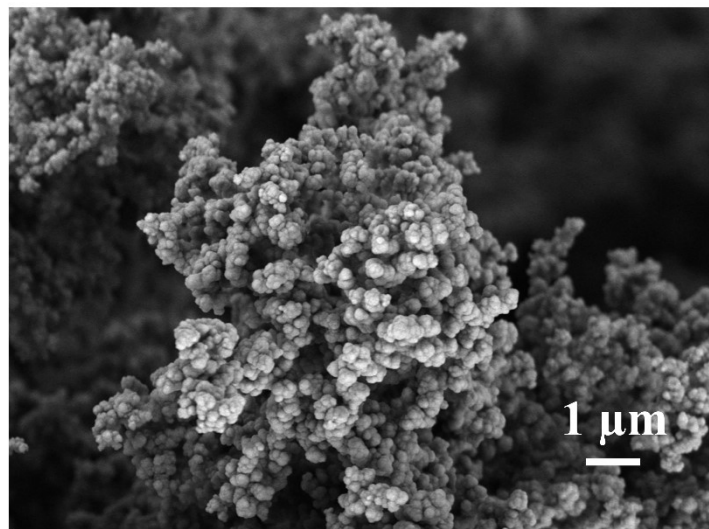

Fig. S1 SEM image of MF@PPy at high magnification.

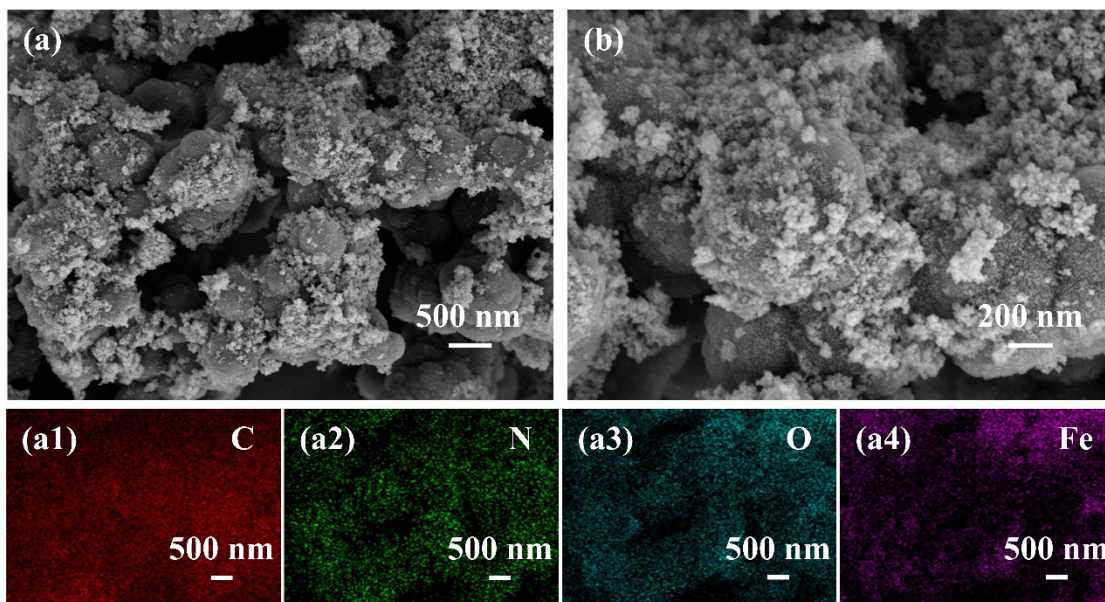

Fig. S2 (a, b) SEM images of PPy@Fe<sub>3</sub>O<sub>4</sub> particles. (a1-a4) EDS mapping images of PPy@Fe<sub>3</sub>O<sub>4</sub> particles.

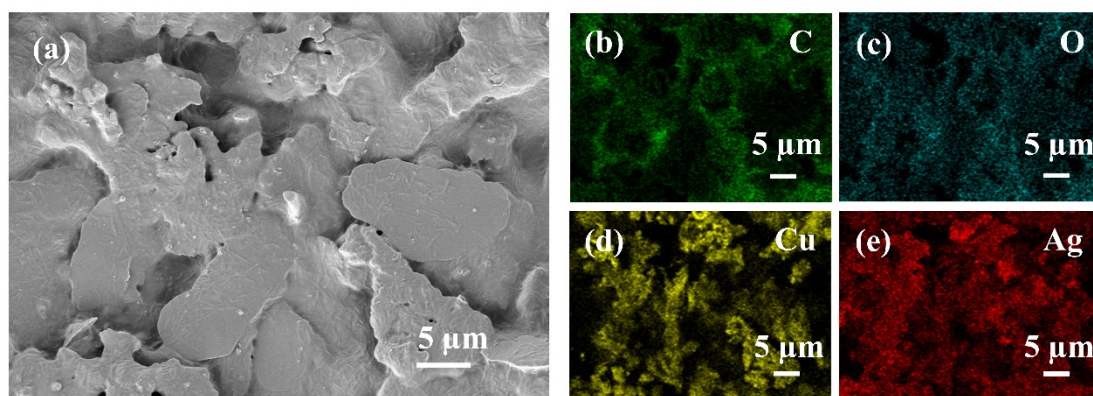

Fig. S3 (a) SEM image and (b-e) EDS mapping images of AgP.

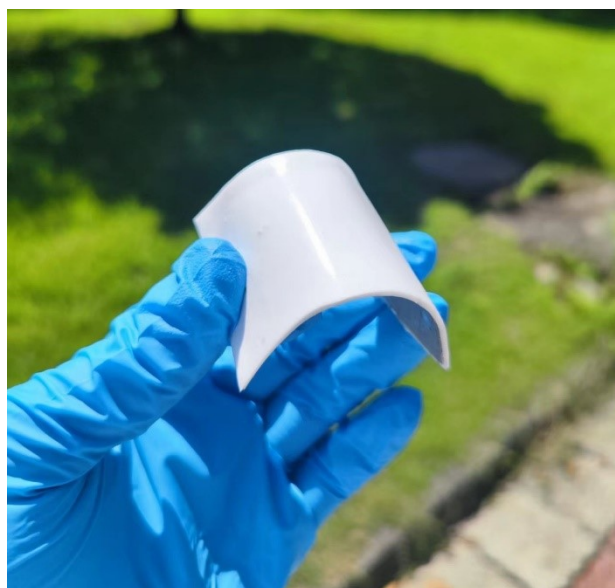

Fig. S4 Optical image of AgP/PDMS/Al<sub>2</sub>O<sub>3</sub> layer.

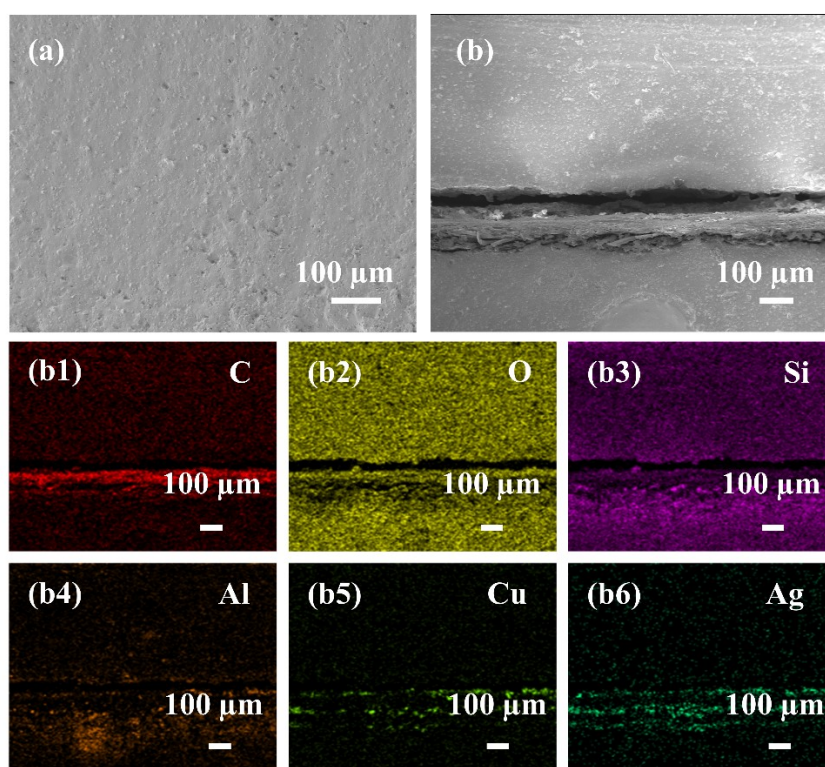

Fig. S5 (a) SEM image of the surface of the AgP/PDMS/Al<sub>2</sub>O<sub>3</sub> layer. (b) SEM image of AgP/PDMS/Al<sub>2</sub>O<sub>3</sub> layer cross sections. (b1-b6) EDS mapping images of AgP/PDMS/Al<sub>2</sub>O<sub>3</sub> layer cross sections.

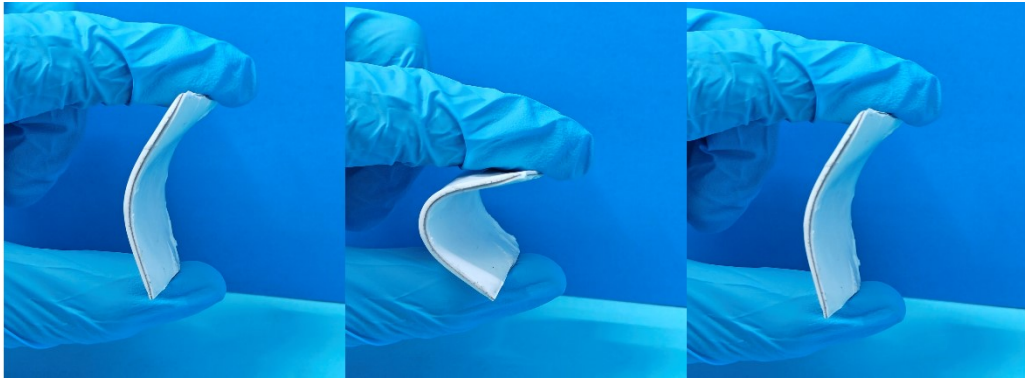

Fig. S6 Digital images of samples after bending 1000 times.

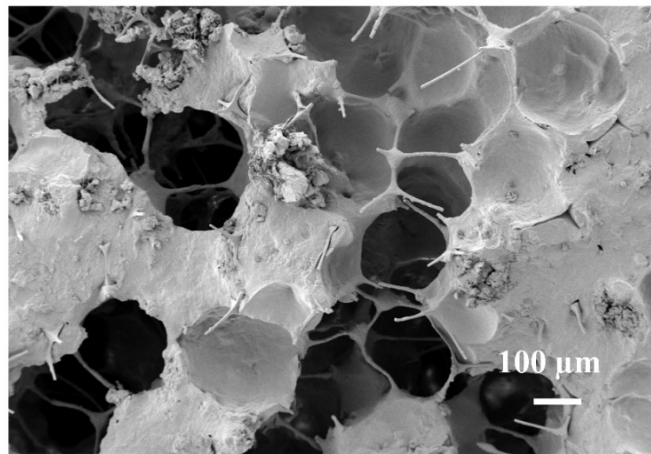

Fig. S7 SEM image of the MPPF.

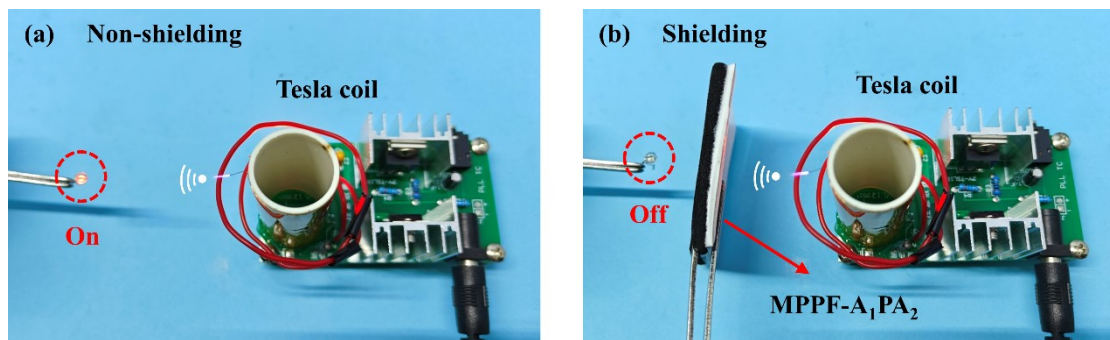

Fig. S8 A practical EMI shielding application measurement in a Tesla coil system with (a) non-shielding and (b) shielding.

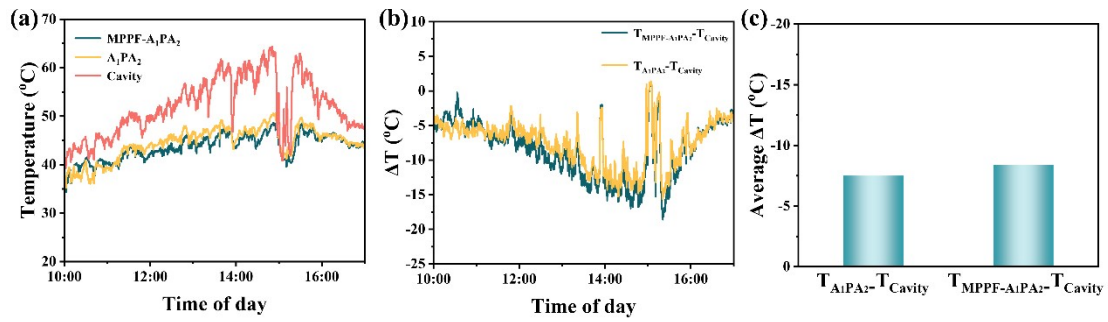

Fig. S9 (a) Real-time temperature profile, (b) temperature difference and (c) average temperature difference for MPPF-A<sub>1</sub>PA<sub>2</sub> and A<sub>1</sub>PA<sub>2</sub> outdoor cooling tests.

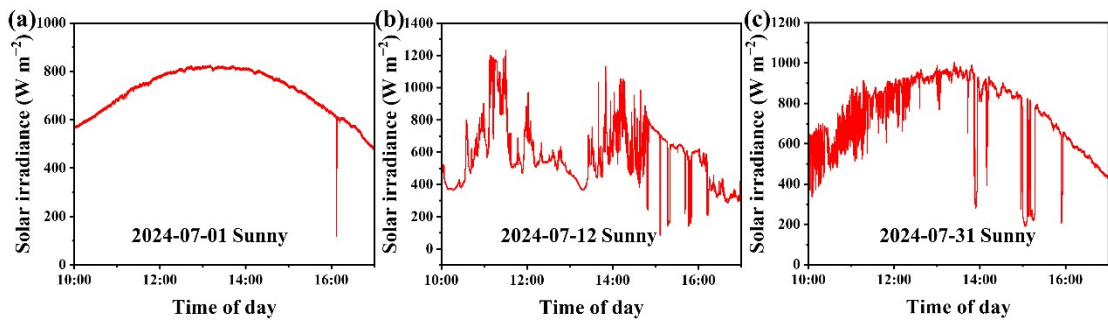

Fig. S10 Solar radiation intensity when (a) glass sheet, (b) Al sheet and (c) wood sheet are used as substrates.

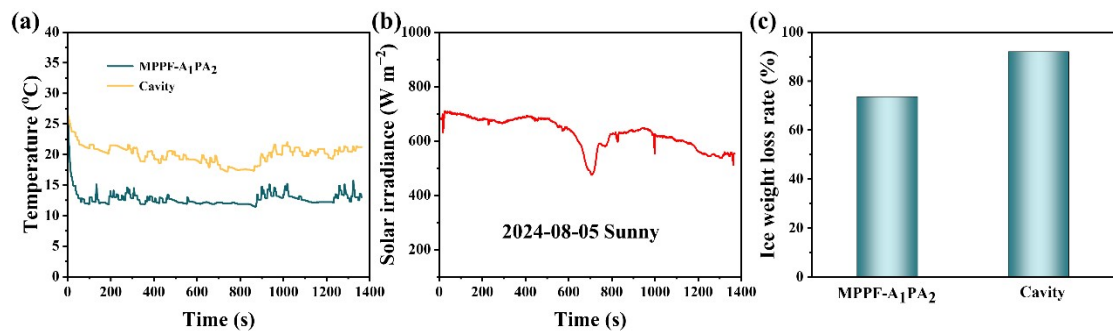

Fig. S11 (a) Real-time temperature profile, (b) solar radiation intensity and (c) ice cube weightlessness of MPPF-A<sub>1</sub>PA<sub>2</sub> composite for ice melt retardation experiment.

Table S1 Comparison of EMI shielding properties of this work with other EMI shielding materials.

| Samples                                                        | EMI SE (dB) | A           | Reference        |
|----------------------------------------------------------------|-------------|-------------|------------------|
| TPU/CNT/Ag                                                     | 79.4        | 0.46        | 1                |
| PF/Fe <sub>3</sub> O <sub>4</sub> @PPy/Cu                      | 41.1        | 0.8         | 2                |
| TPU/AgNR foam                                                  | 35.5        | 0.915       | 3                |
| MPP-MXene/CNF                                                  | 47.2        | 0.972       | 4                |
| Ni@MF-5/CNT-75/PBAT                                            | 38.3        | 0.19        | 5                |
| VMQ/Fe <sub>3</sub> O <sub>4</sub> @MWCNT/Ag@NWF               | 90          | 0.46        | 6                |
| NiM10/PCM                                                      | 34.6        | 0.835       | 7                |
| Ni@MF/CNT3/TSM/PDMS                                            | 45.3        | 0.72        | 8                |
| rGO@Fe <sub>3</sub> O <sub>4</sub> /T-ZnO/Ag/WPU               | 87.2        | 0.61        | 9                |
| VMQ/Ag@GF/MWCNT/Fe <sub>3</sub> O <sub>4</sub>                 | 78.6        | 0.82        | 10               |
| Sb <sub>2</sub> O <sub>3</sub> -Ni-MWCNTs/PDMS                 | 54.4        | 0.51        | 11               |
| Silicone rubber/Ag@HGMS/Fe <sub>3</sub> O <sub>4</sub> @MWCNTs | 59.4        | 0.41        | 12               |
| FA-CNF/MXene/FA-CNF                                            | 63.9        | 0.33        | 13               |
| CNF-MXene composite aerogels                                   | 93.5        | 0.26        | 14               |
| MXene/ANFs hybrid aerogel                                      | 56.8        | 0.09        | 15               |
| <b>MPPF-A<sub>1</sub>PA<sub>2</sub></b>                        | <b>65.0</b> | <b>0.79</b> | <b>This work</b> |

Table S2 Comparison of cooling performances of the radiative cooling materials.

| Materials                                   | Year | Temperature drop (°C) | Solar irradiance (W m <sup>-2</sup> ) | Reference |
|---------------------------------------------|------|-----------------------|---------------------------------------|-----------|
| PDMS/Al <sub>2</sub> O <sub>3</sub>         | 2020 | 5                     | 862                                   | 16        |
| SiO <sub>2</sub> /TiO <sub>2</sub> /PDMS/Al | 2022 | 5.3                   | 523                                   | 17        |



|                                                       |      |            |            |                  |
|-------------------------------------------------------|------|------------|------------|------------------|
| AlPO <sub>4</sub> /PDMS fabric                        | 2020 | 5.4        | 998        | 18               |
| Porous PDMS sponge                                    | 2021 | 4.6        | 900        | 19               |
| PDMS/Al                                               | 2021 | 2.4        | 760        | 20               |
| PMMA/SiO <sub>2</sub>                                 | 2021 | 6.0-8.9    | 900        | 21               |
| PDMS/PE aerogel                                       | 2020 | 5.0-6.0    | 1000       | 22               |
| HDPE/Cr <sub>2</sub> O <sub>3</sub> /TiO <sub>2</sub> | 2021 | 7.0        | 1100       | 23               |
| SiO <sub>2</sub> @TiO <sub>2</sub> /PDMS/Al           | 2022 | 6.9        | 1000       | 24               |
| PVDF/BaSO <sub>4</sub> /SiO <sub>2</sub>              | 2021 | 5.1        | 803        | 25               |
| SiO <sub>2</sub> /Al                                  | 2021 | 7.3        | 633        | 26               |
| BaSO <sub>4</sub> /P(VDF-HFP)                         | 2022 | 2.0        | 1000       | 27               |
| <b>MPPF-A<sub>1</sub>PA<sub>2</sub></b>               |      | <b>8.7</b> | <b>713</b> | <b>This work</b> |

## Notes and references

- 1 B. Sun, S. Sun, P. He, H.-Y. Mi, B. Dong, C. Liu and C. Shen, *Chem. Eng. J.*, 2021, **416**, 129083.
- 2 W. Chu, J. Li, J. Lin, W. Li, J. Xin, F. Liu, X. He, Z. Ma and Q. Zhao, *Compos. Sci. Technol.*, 2024, **249**, 110489.
- 3 Z. Li, Y. Shen, Y. Zhou, B. Zhou, C. Liu and Y. Feng, *J. Mater. Sci. Technol.*, 2024, **197**, 9–16.
- 4 J. Tang, M. Fu, T. Zhang, T. Zuo, W. Feng, W. Wang and D. Yu, *Polymer*, 2024, **308**, 127354.
- 5 B. Xue, Y. Li, Z. Cheng, S. Yang, L. Xie, S. Qin and Q. Zheng, *Nano-Micro Lett.*, 2022, **14**, 16.
- 6 J. Yang, X. Liao, G. Wang, J. Chen, W. Tang, T. Wang and G. Li, *J. Mater. Chem. C*, 2020, **8**, 147–157.

- 7 H. Cheng, L. Xing, Y. Zuo, Y. Pan, M. Huang, A. Alhadhrami, M. M. Ibrahim, Z. M. El-Bahy, C. Liu, C. Shen and X. Liu, *Adv. Compos. Hybrid Mater.*, 2022, **5**, 755–765.
- 8 Q. Peng, M. Ma, Q. Chu, H. Lin, W. Tao, W. Shao, S. Chen, Y. Shi, H. He and X. Wang, *J. Mater. Chem. A*, 2023, **11**, 10857–10866.
- 9 Y. Xu, Y. Yang, D.-X. Yan, H. Duan, G. Zhao and Y. Liu, *ACS Appl. Mater. Interfaces*, 2018, **10**, 19143–19152.
- 10 J. Yang, X. Liao, G. Wang, J. Chen, P. Song, W. Tang, F. Guo, F. Liu and G. Li, *Compos. Sci. Technol.*, 2021, **206**, 108663.
- 11 Q.-M. He, J.-R. Tao, Y. Yang, D. Yang, K. Zhang, B. Fei and M. Wang, *Composites, Part A*, 2022, **156**, 106901.
- 12 J. Yang, X. Liao, G. Wang, J. Chen, F. Guo, W. Tang, W. Wang, Z. Yan and G. Li, *Chem. Eng. J.*, 2020, **390**, 124589.
- 13 Z. Guo, P. Ren, J. Wang, J. Tang, F. Zhang, Z. Zong, Z. Chen, Y. Jin and F. Ren, *Composites, Part B*, 2022, **236**, 109836.
- 14 H. Wang, Y. Jiang, Z. Ma, Y. Shi, Y. Zhu, R. Huang, Y. Feng, Z. Wang, M. Hong, J. Gao, L. Tang and P. Song, *Adv. Funct. Mater.*, 2023, **33**, 2306884.
- 15 Z. Lu, F. Jia, L. Zhuo, D. Ning, K. Gao and F. Xie, *Composites, Part B*, 2021, **217**, 108853.
- 16 T. Li, Y. Zhai, S. He, W. Gan, Z. Wei, M. Heidarinejad, D. Dalgo, R. Mi, X. Zhao, J. Song, J. Dai, C. Chen, A. Aili, A. Vellore, A. Martini, R. Yang, J. Srebric, X. Yin and L. Hu, *Science*, 2019, **364**, 760–763.

- 17Y. Sun, M. Javed, Y. Ji, M. Z. Nawaz, Y. Wang, Z. Cai and B. Xu, *Sol. Energ. Mat. Sol. C.*, 2022, **245**, 111836.
- 18S. Zhong, L. Yi, J. Zhang, T. Xu, L. Xu, X. Zhang, T. Zuo and Y. Cai, *Chem. Eng. J.*, 2021, **407**, 127104.
- 19L. Zhou, J. Rada, H. Zhang, H. Song, S. Mirniaharikandi, B. S. Ooi and Q. Gan, *Adv. Sci.*, 2021, **8**, 2102502.
- 20K. Lin, L. Chao, T. C. Ho, C. Lin, S. Chen, Y. Du, B. Huang and C. Y. Tso, *Energ. Buildings*, 2021, **252**, 111400.
- 21T. Wang, Y. Wu, L. Shi, X. Hu, M. Chen and L. Wu, *Nat. Commun.*, 2021, **12**, 365.
- 22M. Yang, W. Zou, J. Guo, Z. Qian, H. Luo, S. Yang, N. Zhao, L. Pattelli, J. Xu and D. S. Wiersma, *ACS Appl. Mater. Interfaces*, 2020, **12**, 25286–25293.
- 23Z. Yang, T. Jiang and J. Zhang, *Sol. Energ. Mat. Sol. C.*, 2021, **219**, 110783.
- 24D. Hu, S. Sun, P. Du, X. Lu, H. Zhang and Z. Zhang, *Composites, Part A*, 2022, **158**, 106949.
- 25Z. Cheng, H. Han, F. Wang, Y. Yan, X. Shi, H. Liang, X. Zhang and Y. Shuai, *Nano Energy*, 2021, **89**, 106377.
- 26L. Carlosena, Á. Andueza, L. Torres, O. Irulegi, R. J. Hernández-Minguillón, J. Sevilla and M. Santamouris, *Sol. Energ. Mat. Sol. C.*, 2021, **230**, 111209.
- 27D. Han, J. Fei, J. Mandal, Z. Liu, H. Li, A. P. Raman and B. F. Ng, *Sol. Energ. Mat. Sol. C.*, 2022, **240**, 111723.
